# Supplementary material
Source: MDPI journal article supplement (https://www.mdpi.com/2073-4344/8/7/272)
Supplement: s1 [file s1]

1 Article

2 **The Roles of Graphene and Ag in the Hybrid**  
 3 **Ag@Ag<sub>2</sub>O-Graphene for Sulfamethoxazole**  
 4 **Degradation**

5 Li Zhou <sup>1,2</sup>, Guoyan Zou <sup>1,2,\*</sup> and Huiping Deng <sup>3,\*</sup>

6 <sup>1</sup> Institute of Eco-environment and Plant Protection, Shanghai Academy of Agricultural Sciences, Shanghai  
 7 201403, China; zhouli@saas.sh.cn (L.Z.)

8 <sup>2</sup> Shanghai Engineering Research Centre of Low-carbon Agriculture (SERCLA), Shanghai 201415, China

9 <sup>3</sup> College of Environmental State Key Laboratory of Pollution Control and Resource Reuse (Tongji  
 10 University), Shanghai 200092, China

11 \* Correspondence: zouguoyan@263.net (G.Z.); denghuiping@tongji.edu.cn (H.D.); Tel.: +86-021-6220-2448 (H.D.);  
 12 Tel.: +86-021-6220-2614 (G.Z.)

13 Received: 24 May 2018; Accepted: 02 July 2018; Published: date

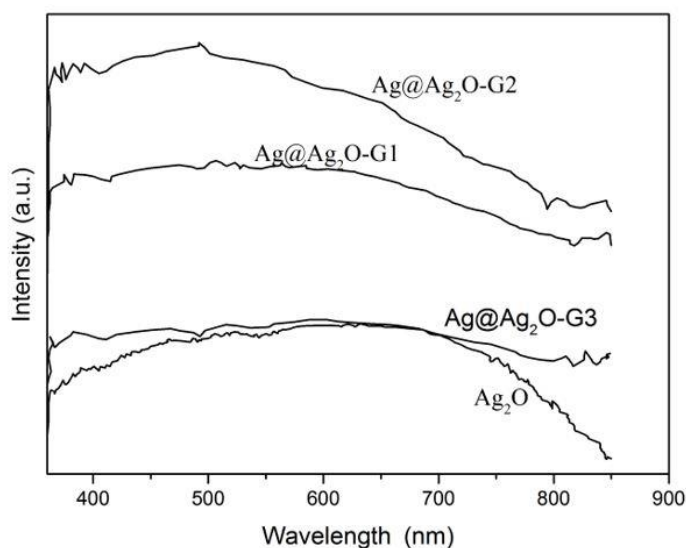

14

15 **Figure S1.** UV-vis spectra of Ag<sub>2</sub>O, Ag@Ag<sub>2</sub>O-G1, Ag@Ag<sub>2</sub>O-G2 and Ag@Ag<sub>2</sub>O-G3.

16 The UV-vis diffuse reflectance spectra of the series photocatalysts are illustrated in Figure S1.  
 17 The pure Ag<sub>2</sub>O showed strong absorption in ultraviolet and visible-light region that should be due  
 18 to its narrow band gap [1]. After loading different amount of graphene and Ag<sup>0</sup> on the Ag<sub>2</sub>O, there are  
 19 apparent increase in the light absorption for Ag@Ag<sub>2</sub>O-G1 and Ag@Ag<sub>2</sub>O-G2, while the Ag@Ag<sub>2</sub>O-G3  
 20 showed slight increase in the light absorption, which may be owing to the too much graphene loading [2].  
 21 It should be noted that the above light absorption order was consistent with the photocatalytic  
 22 activities of photocatalysts, suggested that the increase light response was helpful for the  
 23 enhancement of the photocatalytic performance.

24 **Table S1.** The rate constants and R<sup>2</sup> of first order kinetic reaction for Ag<sub>2</sub>O, Ag@Ag<sub>2</sub>O-G1, Ag@Ag<sub>2</sub>O-  
 25 G2 and Ag@Ag<sub>2</sub>O-G3 to degrade SMX.

| Light Source                                              | Simulated Solar Light |                         |                         |                         | Visible Light     |                         |                         |                         |
|-----------------------------------------------------------|-----------------------|-------------------------|-------------------------|-------------------------|-------------------|-------------------------|-------------------------|-------------------------|
|                                                           | Ag <sub>2</sub> O     | Ag@Ag <sub>2</sub> O-G1 | Ag@Ag <sub>2</sub> O-G2 | Ag@Ag <sub>2</sub> O-G3 | Ag <sub>2</sub> O | Ag@Ag <sub>2</sub> O-G1 | Ag@Ag <sub>2</sub> O-G2 | Ag@Ag <sub>2</sub> O-G3 |
| Photocatalysts<br>K×10 <sup>-2</sup> (min <sup>-1</sup> ) | 1.57                  | 3.53                    | 4.51                    | 2.69                    | 1.22              | 3.40                    | 3.79                    | 2.78                    |
| R <sup>2</sup>                                            | 0.965                 | 0.982                   | 0.955                   | 0.978                   | 0.984             | 0.989                   | 0.953                   | 0.973                   |

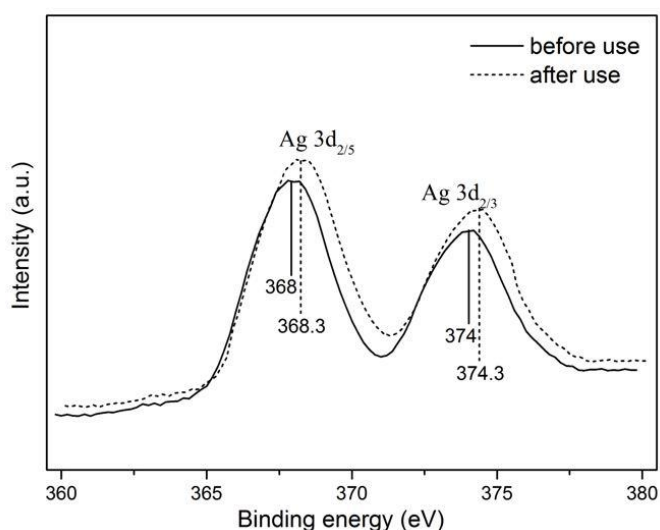

26

27

**Figure S2.** XPS spectra of Ag3d in Ag@Ag<sub>2</sub>O-G2 before and after recycle use.

28

29

30

31

32

33

Compared with the XPS spectrum of Ag 3d in the original Ag@Ag<sub>2</sub>O-G2 (368 eV and 374 eV for Ag 3d<sub>2/5</sub> and Ag 3d<sub>2/3</sub>, respectively), the Ag 3d of used Ag@Ag<sub>2</sub>O-G2 shifted to a higher binding energy (368.3 eV and 374.3 eV for Ag 3d<sub>2/5</sub> and Ag 3d<sub>2/3</sub>, respectively, as shown in Figure S2). Because of the higher binding energy of Ag 3d electrons of Ag<sup>0</sup> than that of Ag<sup>+</sup>, the shift of the Ag 3d peak may indicate the formation of more Ag<sup>0</sup> during the photocatalytic process [3], which could explain the change of adsorption ability and photocatalytic activities of Ag@Ag<sub>2</sub>O-G2.

34

35

36

37

38

39

40

1. Xu, Y.; Schoonen, M.A.A. The absolute energy positions of conduction and valence bands of selected semiconducting minerals. *Am. Mineral.* **2000**, *85*, 543–556, doi:10.2138/am-2000-0416.
2. Ma, Y.; Wang, J.; Xu, S.; Feng, S.; Wang, J. Ag<sub>2</sub>O/sodium alginate-reduced graphene oxide aerogel beads for efficient visible light driven photocatalysis. *Appl. Surf. Sci.* **2018**, *430*, 155–164, doi:10.1016/j.apsusc.2017.03.299.
3. Yu, J.; Dai, G.; Huang, B. Fabrication and Characterization of Visible-Light-Driven Plasmonic Photocatalyst Ag/AgCl/TiO<sub>2</sub> TiO<sub>2</sub> Nanotube Arrays. *J. Phys. Chem. C* **2009**, *113*, 16394–16401, doi:10.1021/jp905247j.
